# Supplementary material for: The Plasma Oxylipidome Links Smoking Status to Peripheral Artery Disease
Source: MDPI journal article supplement (doi:10.3390/metabo12070627), 2022-07-07
Supplement: s1 [file s1]

**Supplemental Table S1** – Individual Plasma Oxylipins by Smoking Status (nM) Mean and Standard Deviation

| Oxylipin        | Never Smoked |         | Quit Smoking |         | Currently Smoking |         |
|-----------------|--------------|---------|--------------|---------|-------------------|---------|
|                 | Mean         | SD      | Mean         | SD      | Mean              | SD      |
| 10-HDoHE        | 0.924        | 1.145   | 0.590        | 1.217   | 0.165             | 0.205   |
| 11,12-DiHETrE   | 0.709        | 0.385   | 0.658        | 0.297   | 0.686             | 0.170   |
| 11-dh-TXB2      | 149.939      | 114.425 | 115.509      | 137.988 | 84.521            | 60.813  |
| 11-HDoHE        | 1.911        | 1.267   | 0.966        | 1.291   | 0.426             | 0.547   |
| 11-HETE         | 0.856        | 0.441   | 0.929        | 1.260   | 0.560             | 0.289   |
| 12(S)-HETE      | 6.194        | 5.530   | 3.996        | 5.189   | 2.914             | 3.768   |
| 12,13 EpODE     | 106.504      | 60.093  | 83.735       | 63.376  | 21.257            | 61.587  |
| 12,13-DiHOME    | 4.883        | 5.224   | 3.160        | 2.418   | 2.961             | 3.608   |
| 12,13-EpOME     | 33.594       | 26.323  | 37.768       | 26.123  | 32.514            | 27.666  |
| 12-HEPE         | 1.796        | 1.539   | 0.978        | 1.514   | 0.447             | 0.636   |
| 13(s)-HODE      | 12.916       | 7.899   | 9.881        | 6.012   | 9.451             | 11.895  |
| 13-HDoHE        | 0.448        | 0.643   | 0.356        | 0.819   | 0.072             | 0.100   |
| 13-HOTrE        | 266.249      | 100.499 | 139.662      | 74.983  | 38.029            | 102.893 |
| 13-OxoODE       | 18.434       | 26.718  | 6.517        | 7.646   | 11.256            | 31.202  |
| 14,15-DiHETrE   | 0.811        | 0.175   | 0.813        | 0.295   | 0.876             | 0.224   |
| 14-HDoHE        | 2.913        | 2.896   | 1.570        | 2.068   | 0.923             | 1.459   |
| 15 HETrE        | 0.731        | 0.813   | 0.621        | 1.041   | 0.517             | 0.759   |
| 15(S)-HETE      | 1.235        | 0.901   | 1.278        | 1.165   | 0.929             | 0.407   |
| 16-HDoHE        | 0.326        | 0.191   | 0.431        | 0.930   | 0.162             | 0.102   |
| 16-HETE         | 0.146        | 0.386   | 0.138        | 0.239   | 0.130             | 0.180   |
| 17-HDoHE        | 0.843        | 1.065   | 1.112        | 2.007   | 0.508             | 0.602   |
| 17-HETE         | 91.956       | 82.045  | 55.573       | 47.235  | 38.497            | 41.410  |
| 18-HEPE         | 0.000        | 0.000   | 0.180        | 0.506   | 0.050             | 0.135   |
| 18-HETE         | 0.185        | 0.236   | 0.331        | 0.631   | 0.340             | 0.178   |
| 19,20 DiHDoPE   | 1.684        | 1.085   | 1.511        | 0.736   | 1.503             | 0.542   |
| 20-HDoHE        | 0.441        | 0.633   | 0.483        | 0.831   | 0.241             | 0.388   |
| 4-HDoHE         | 0.871        | 0.858   | 0.713        | 1.246   | 0.286             | 0.227   |
| 5(S)-HETE       | 1.818        | 1.109   | 1.592        | 1.871   | 0.947             | 0.454   |
| 5,6-DiHETrE     | 0.305        | 0.247   | 0.277        | 0.211   | 0.253             | 0.111   |
| 5-HEPE          | 0.675        | 0.750   | 0.839        | 1.405   | 0.282             | 0.398   |
| 6-k-PGF1a       | 0.640        | 0.300   | 0.734        | 0.246   | 0.695             | 0.217   |
| 7-HDoHE         | 0.178        | 0.274   | 0.338        | 0.905   | 0.087             | 0.132   |
| 8,9-DiHETrE     | 0.122        | 0.110   | 0.215        | 0.216   | 0.157             | 0.091   |
| 8-HETE          | 1.014        | 1.418   | 0.845        | 1.099   | 0.458             | 0.329   |
| 9(S)-HODE       | 11.120       | 8.512   | 8.607        | 6.278   | 8.317             | 10.030  |
| 9,10,13 TriHOME | 22.668       | 52.820  | 3.186        | 7.370   | 4.607             | 15.732  |
| 9,10-DiHOME     | 4.283        | 3.583   | 3.656        | 3.932   | 3.163             | 3.657   |
| 9,12,13 TriHOME | 11.948       | 26.975  | 2.072        | 3.288   | 2.691             | 8.509   |

|                   |        |         |       |        |        |        |
|-------------------|--------|---------|-------|--------|--------|--------|
| <b>9-HOTrE</b>    | 0.935  | 0.703   | 0.815 | 0.764  | 0.680  | 0.510  |
| <b>PGD2</b>       | 44.635 | 109.143 | 7.935 | 12.841 | 54.318 | 53.696 |
| <b>PGE2</b>       | 0.264  | 0.187   | 0.360 | 0.175  | 0.341  | 0.138  |
| <b>PGF2a</b>      | 0.141  | 0.373   | 0.325 | 0.509  | 0.217  | 0.347  |
| <b>ResolvinD2</b> | 6.331  | 11.296  | 6.726 | 10.624 | 4.861  | 2.986  |
| <b>TXB2</b>       | 0.072  | 0.103   | 0.137 | 0.317  | 0.141  | 0.334  |

**Supplemental Table S2** – Individual Plasma OxPCs by Smoking Status (ng/100µL)

| OxPC                             | Never Smoked |        | Quit Smoking |         | Currently Smoking |        |
|----------------------------------|--------------|--------|--------------|---------|-------------------|--------|
|                                  | Mean         | SD     | Mean         | SD      | Mean              | SD     |
| 4-oxo-butyryl-PPC                | 0.351        | 0.259  | 0.185        | 0.217   | 0.154             | 0.123  |
| POVPC                            | 0.765        | 0.604  | 0.514        | 0.584   | 0.493             | 0.518  |
| Succinoyl-PPC                    | 1.233        | 0.516  | 0.868        | 0.797   | 0.645             | 0.299  |
| PGPC                             | 0.411        | 0.258  | 0.275        | 0.289   | 0.241             | 0.165  |
| SOVPC                            | 1.868        | 1.206  | 1.462        | 1.738   | 1.459             | 1.650  |
| Furylbutanoyl-PPC                | 0.147        | 0.138  | 0.094        | 0.089   | 0.090             | 0.073  |
| KOHA-PC                          | 0.497        | 0.433  | 0.409        | 0.497   | 0.303             | 0.268  |
| 8octanoyl-PPC                    | 1.934        | 1.160  | 1.421        | 1.721   | 1.399             | 0.978  |
| SGPC                             | 1.182        | 0.622  | 0.860        | 0.600   | 0.892             | 0.523  |
| Acetal-POVPC                     | 0.064        | 0.034  | 0.046        | 0.032   | 0.048             | 0.027  |
| KOOA-PPC                         | 0.413        | 0.203  | 0.271        | 0.242   | 0.211             | 0.184  |
| PONPC                            | 11.845       | 7.622  | 9.056        | 10.851  | 8.126             | 5.289  |
| Furylbutanoyl-SPC                | 0.387        | 0.463  | 0.234        | 0.258   | 0.206             | 0.164  |
| KODiA-PPC                        | 2.449        | 1.562  | 1.983        | 1.691   | 2.159             | 1.432  |
| PAzPC                            | 2.473        | 1.206  | 1.889        | 1.750   | 1.833             | 1.331  |
| KOOA-SPC                         | 3.303        | 4.055  | 4.279        | 8.765   | 2.965             | 4.966  |
| SONPC                            | 7.541        | 5.334  | 5.896        | 6.493   | 6.027             | 4.221  |
| Furyloctanoyl-PPC                | 0.460        | 0.480  | 0.396        | 0.380   | 0.453             | 0.330  |
| KODiA-SPC                        | 0.754        | 0.585  | 0.759        | 0.651   | 0.807             | 0.540  |
| SAzPC                            | 1.884        | 1.190  | 1.580        | 1.256   | 1.609             | 0.998  |
| Acetal-PONPC                     | 0.230        | 0.165  | 0.190        | 0.148   | 0.199             | 0.115  |
| KODA-PPC                         | 1.488        | 3.056  | 2.246        | 2.603   | 3.479             | 2.485  |
| HODA-PPC                         | 1.181        | 1.335  | 0.909        | 0.994   | 1.309             | 1.078  |
| 12-oxo-8,10-dodecendienoyl-PPC   | 0.055        | 0.047  | 0.048        | 0.033   | 0.035             | 0.025  |
| Furyloctanoyl-SPC                | 0.783        | 0.756  | 0.994        | 1.462   | 0.848             | 0.716  |
| KDdiA-PPC                        | 1.485        | 1.218  | 1.565        | 1.028   | 1.884             | 0.988  |
| HDdiA-PPC                        | 0.060        | 0.067  | 0.059        | 0.160   | 0.026             | 0.014  |
| Acetal-SONPC                     | 0.132        | 0.044  | 0.090        | 0.063   | 0.079             | 0.040  |
| 10-OH-5,8,11-tridecatrienoyl-PPC | 0.045        | 0.024  | 0.060        | 0.065   | 0.057             | 0.042  |
| HODA-SPC                         | 17.850       | 30.811 | 9.658        | 14.937  | 9.861             | 15.978 |
| KDiA-SPC                         | 0.758        | 0.361  | 1.067        | 1.532   | 0.839             | 0.683  |
| HDiA-SPC                         | 0.268        | 0.171  | 0.153        | 0.140   | 0.134             | 0.063  |
| 10-OH-5,8,11-tridecatrienoyl-SPC | 45.793       | 38.441 | 71.144       | 125.482 | 46.778            | 19.342 |
| PLPC-keto                        | 1.592        | 1.251  | 1.479        | 1.003   | 1.575             | 0.811  |
| PLPC-OH                          | 1.905        | 1.040  | 1.677        | 0.808   | 1.601             | 0.440  |
| PLPC-epoxy,keto                  | 10.012       | 7.504  | 11.788       | 7.630   | 13.278            | 6.002  |
| PLPC-OOH                         | 1.532        | 0.976  | 1.609        | 0.913   | 1.774             | 0.753  |
| 15-deoxy-Δ12,14-isoPGJ2-PPC      | 0.261        | 0.209  | 0.203        | 0.173   | 0.207             | 0.195  |
| PAPC-keto                        | 0.758        | 0.511  | 0.680        | 0.395   | 0.700             | 0.341  |

|                             |        |        |        |        |       |        |
|-----------------------------|--------|--------|--------|--------|-------|--------|
| PAPC-OHPAPC-epoxy           | 0.978  | 0.533  | 0.960  | 0.435  | 0.931 | 0.370  |
| SLPC-keto                   | 1.475  | 1.164  | 0.866  | 0.412  | 0.860 | 0.335  |
| SLPC-OH                     | 2.100  | 2.236  | 1.653  | 0.939  | 1.696 | 0.685  |
| PLPC-OOH,keto               | 2.299  | 1.645  | 1.859  | 1.130  | 1.816 | 0.901  |
| PLPC-OOH,OH                 | 1.736  | 2.103  | 1.822  | 1.741  | 1.612 | 1.704  |
| PLPC-diOH,epoxy             | 1.893  | 1.808  | 1.579  | 1.271  | 1.648 | 1.135  |
| isoPG(A2,I2)-PPC            | 10.099 | 10.333 | 9.597  | 8.759  | 9.799 | 5.761  |
| PAPC-OOH,                   | 5.548  | 4.923  | 4.760  | 2.722  | 4.940 | 2.131  |
| SLPC-epoxy,keto             | 2.254  | 1.820  | 2.579  | 1.378  | 2.732 | 1.122  |
| SLPC-OOH                    | 0.362  | 0.224  | 0.644  | 1.486  | 0.307 | 0.113  |
| 2,3-dinor-isoTxB2-PPC       | 0.216  | 0.154  | 0.128  | 0.093  | 0.132 | 0.073  |
| 15-deoxy-?12,14-isoPGJ2-PPC | 0.378  | 0.278  | 0.342  | 0.501  | 0.264 | 0.102  |
| SAPC-keto                   | 0.556  | 0.397  | 0.546  | 0.359  | 0.591 | 0.308  |
| SAPC-OH                     | 0.530  | 0.265  | 0.473  | 0.220  | 0.426 | 0.147  |
| PEIPC                       | 0.710  | 0.534  | 0.579  | 0.304  | 0.585 | 0.222  |
| isoPG(E2,I2,D2)-PPC         | 1.214  | 0.836  | 1.248  | 0.897  | 1.123 | 0.514  |
| isoPGF2 $\alpha$ -PPC       | 8.182  | 16.789 | 4.734  | 9.799  | 2.094 | 4.850  |
| SLPC-OOH,OH                 | 26.697 | 61.652 | 19.947 | 48.973 | 8.218 | 27.304 |
| SLPC-triOH                  | 0.360  | 0.222  | 1.540  | 7.317  | 0.272 | 0.122  |
| SECPC                       | 0.305  | 0.197  | 0.327  | 0.720  | 0.250 | 0.108  |
| isoPG(A2,I2)-SPC            | 0.267  | 0.144  | 0.206  | 0.131  | 0.196 | 0.074  |
| SAPC-OOH                    | 0.280  | 0.109  | 0.255  | 0.101  | 0.239 | 0.058  |
| PAPC-OOH,OH,keto            | 0.000  | 0.122  | 0.130  | 0.075  | 0.135 | 0.053  |
| PAPC-diOOH                  | 0.150  | 0.091  | 0.102  | 0.066  | 0.101 | 0.042  |
| iso-TxB2-PPC                | 0.232  | 0.149  | 0.144  | 0.081  | 0.144 | 0.050  |
| SLPC-diOOH,epoxy            | 0.462  | 0.339  | 0.409  | 0.283  | 0.442 | 0.241  |
| SLPC-OOH,OH,keto            | 0.423  | 0.299  | 0.361  | 0.233  | 0.369 | 0.156  |
| SEIPC                       | 0.302  | 0.233  | 0.294  | 0.210  | 0.276 | 0.151  |
| isoPG(E2,I2,D2)-SPC         | 0.170  | 0.139  | 0.165  | 0.170  | 0.154 | 0.073  |
| isoPGF2 $\alpha$ -SPC       | 0.154  | 0.085  | 0.131  | 0.115  | 0.131 | 0.062  |
| PAPC-diOOH,OH               | 0.085  | 0.058  | 0.062  | 0.041  | 0.064 | 0.031  |
| SLPC-diOOH,keto,epoxy       | 0.129  | 0.050  | 0.091  | 0.062  | 0.073 | 0.025  |
| SLPC-diOOH,OH,epoxy         | 0.171  | 0.083  | 0.136  | 0.088  | 0.117 | 0.033  |
| SAPC-OOH,diketo             | 0.180  | 0.115  | 0.159  | 0.095  | 0.143 | 0.039  |
| SAPC-OOH,OH,keto            | 0.108  | 0.071  | 0.090  | 0.054  | 0.083 | 0.031  |
| SAPC-diOOH                  | 0.121  | 0.075  | 0.099  | 0.055  | 0.099 | 0.037  |
| Iso-TxB2-SPC                | 0.261  | 0.188  | 0.259  | 0.189  | 0.284 | 0.145  |
| PAPC-triOOH                 | 0.555  | 0.389  | 0.443  | 0.344  | 0.491 | 0.252  |
| SLPC-triOOH                 | 0.075  | 0.058  | 0.056  | 0.042  | 0.055 | 0.030  |
| SAPC-OOH,OH,epoxy           | 0.088  | 0.035  | 0.067  | 0.040  | 0.066 | 0.025  |
| SAPC-diOOH,OH               | 0.050  | 0.037  | 0.043  | 0.034  | 0.038 | 0.017  |
| PAPC-triOOH,OH              | 0.064  | 0.021  | 0.070  | 0.036  | 0.069 | 0.021  |
| SAPC-triOOH                 | 0.069  | 0.050  | 0.055  | 0.029  | 0.054 | 0.025  |

|                |       |       |       |       |       |       |
|----------------|-------|-------|-------|-------|-------|-------|
| SAPC-triOOH,OH | 0.044 | 0.015 | 0.053 | 0.063 | 0.043 | 0.036 |
|----------------|-------|-------|-------|-------|-------|-------|
